# Supplementary material for: The Reverse Shock Index Multiplied by Glasgow Coma Scale Score (rSIG) and Prediction of Mortality Outcome in Adult Trauma Patients: A Cross-Sectional Analysis Based on Registered Trauma Data
Source: PubMed Central journal article supplement (PMC6266192; doi:10.3390/ijerph15112346), 2018-10-24
Supplement: ijerph-15-02346-s001.pdf [file ijerph-15-02346-s001.pdf]

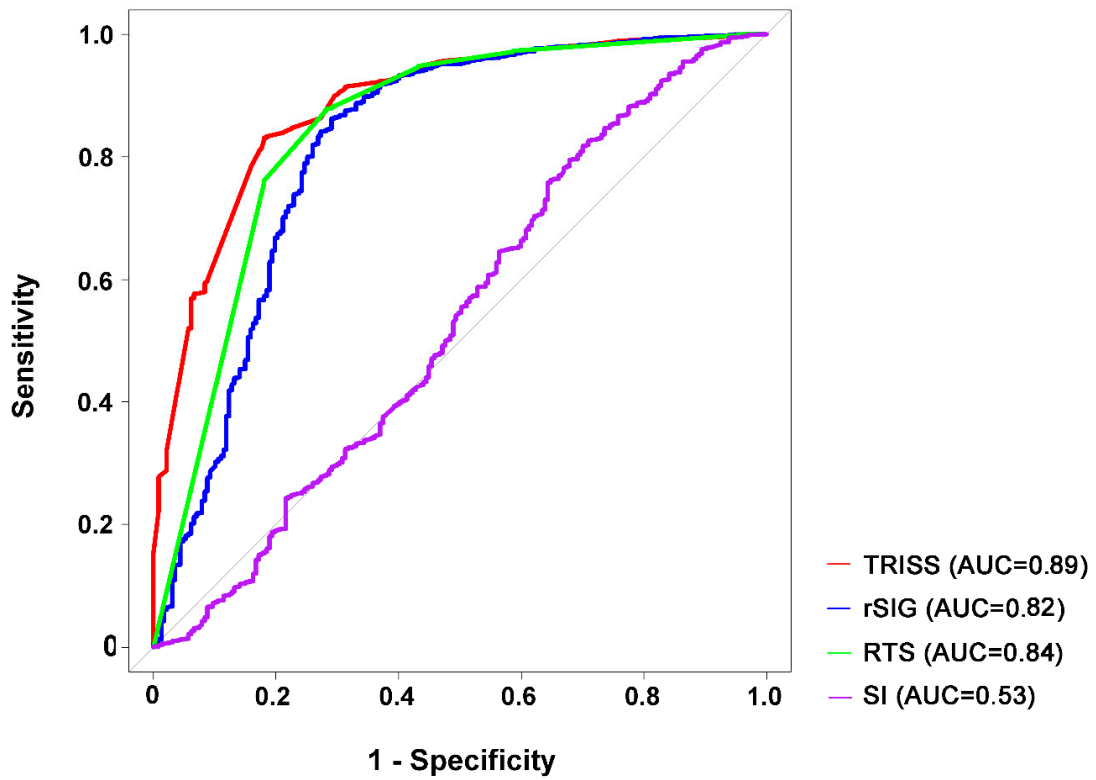

Figure S1. Area under the curve (AUC) of TRISS, rSIG, RTS, and SI in predicting the mortality of patients with isolated traumatic brain injury.

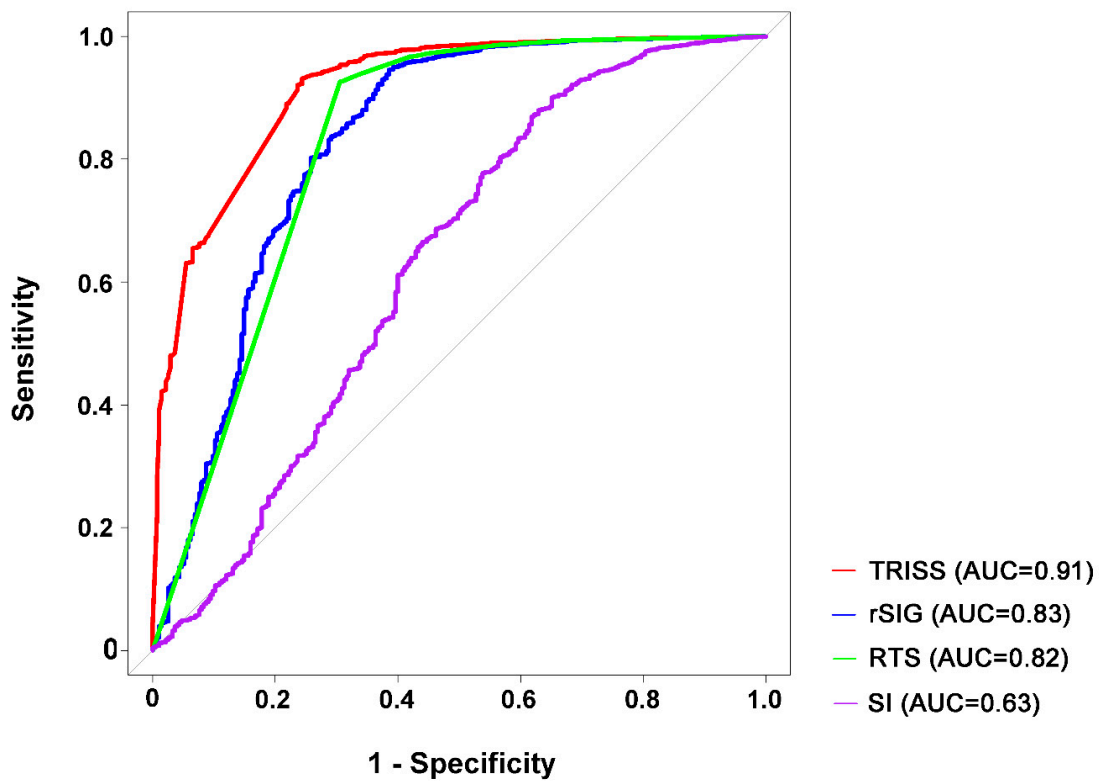

**Figure S2.** Area under the curve (AUC) of TRISS, rSIG, RTS, and SI in predicting the mortality of patients without traumatic brain injury.

**Table S1.** Characteristics variables of patients with isolated traumatic brain injury (only head AIS  $\geq 3$ ).

| Variables      | Total<br>(n = 2,268) | Survival           |                      | P-value        |        |
|----------------|----------------------|--------------------|----------------------|----------------|--------|
|                |                      | No (n = 227)       | Yes (n = 2,041)      |                |        |
| Age (years)    | 61 [45, 74]          | 68 [54, 78]        | 61 [45, 74]          | <0.001         |        |
| ISS            | 16 [9, 16]           | 25 [16, 25]        | 16 [10, 16]          | <0.001         |        |
| GCS            | 15 [11, 15]          | 4 [3, 9]           | 15 [13, 15]          | <0.001         |        |
| SBP (mmHg)     | 154 [134, 180]       | 158 [134, 198]     | 154 [135, 180]       | 0.016          |        |
| HR (times/min) | 84 [74, 97]          | 92 [75, 109]       | 84 [74, 96]          | <0.001         |        |
| RR (times/min) | 18 [18, 20]          | 19 [17, 20]        | 18 [18, 20]          | 0.831          |        |
| SI             | 0.55 [0.45, 0.66]    | 0.56 [0.45, 0.73]  | 0.54 [0.44, 0.65]    | 0.103          |        |
| rSI            | 1.83 [1.51, 2.24]    | 1.78 [1.37, 2.23]  | 1.85 [1.53, 2.26]    | 0.103          |        |
| rSIG           | 24.62 [17.75, 30.79] | 8.76 [5.54, 17.96] | 25.36 [19.19, 31.23] | <0.001         |        |
| RTS            | 7.84 [6.90, 7.84]    | 5.03 [4.09, 6.90]  | 7.84 [7.84, 7.84]    | <0.001         |        |
| TRISS          | 0.97 [0.94, 0.99]    | 0.68 [0.45, 0.89]  | 0.97 [0.94, 0.99]    | <0.001         |        |
| Sex            | Female               | 848 (37.4%)        | 80 (35.2%)           | 768 (37.6%)    | 0.527  |
|                | Male                 | 1,420 (62.6%)      | 147 (64.8%)          | 1,273 (62.47%) |        |
| AIS (Head)     | 3                    | 693 (30.6%)        | 15 (6.6%)            | 678 (33.2%)    | <0.001 |
|                | 4                    | 1,253 (55.3%)      | 68 (30.0%)           | 1,185 (58.1%)  |        |
|                | 5                    | 310 (13.7%)        | 134 (59.0%)          | 176 (8.6%)     |        |
|                | 6                    | 12 (0.5%)          | 10 (4.4%)            | 2 (0.1%)       |        |

AIS = abbreviated injury scale; GCS = Glasgow coma scale; ISS = injury severity score; rSI = reverse shock index; rSIG = rSI multiplied by GCS score; RTS = revised trauma score; SBP = systolic blood pressure; SI = shock index; TRISS = the trauma and injury severity score.

**Table S2.** Characteristics variables of patients without traumatic brain injury.

| Variables       | Total<br>(n = 16482) | Survival            |                      | P-value        |        |
|-----------------|----------------------|---------------------|----------------------|----------------|--------|
|                 |                      | No (n = 275)        | Yes (n = 16207)      |                |        |
| Age (years)     | 54 [37, 68]          | 61 [42, 77]         | 54 [37, 67]          | <0.001         |        |
| ISS             | 9 [4, 9]             | 29 [17, 34]         | 8 [4, 9]             | <0.001         |        |
| GCS             | 15 [15, 15]          | 7 [3, 15]           | 15 [15, 15]          | <0.001         |        |
| SBP (mmHg)      | 146 [126, 168]       | 145 [107, 176]      | 146 [126, 168]       | 0.019          |        |
| HR (times/min)  | 85 [75, 97]          | 96 [78, 118]        | 85 [75, 96]          | <0.001         |        |
| RR (times/min)  | 18 [18, 20]          | 20 [18, 21]         | 18 [18, 20]          | <0.001         |        |
| SI              | 0.58 [0.48, 0.70]    | 0.67 [0.51, 0.93]   | 0.58 [0.48, 0.69]    | <0.001         |        |
| rSI             | 1.73 [1.43, 2.09]    | 1.49 [1.07, 1.97]   | 1.74 [1.44, 2.09]    | <0.001         |        |
| rSIG            | 25.56 [20.82, 31.00] | 10.69 [5.09, 20.45] | 25.67 [21.00, 31.09] | <0.001         |        |
| RTS             | 7.84 [7.84, 7.84]    | 5.97 [4.09, 7.84]   | 7.84 [7.84, 7.84]    | <0.001         |        |
| TRISS           | 0.98 [0.97, 1.00]    | 0.72 [0.36, 0.94]   | 0.98 [0.97, 1.00]    | <0.001         |        |
| Sex             | Female               | 7,302 (44.3%)       | 97 (35.3%)           | 7,205 (44.5%)  | 0.003  |
|                 | Male                 | 9,180 (55.7%)       | 178 (64.7%)          | 9,002 (55.5%)  |        |
| AIS (Head)      | 0                    | 13,407 (81.3%)      | 87 (31.6%)           | 13,320 (82.2%) | <0.001 |
|                 | 1                    | 1,006 (6.1%)        | 12 (4.4%)            | 994 (6.1%)     |        |
|                 | 2                    | 388 (2.4%)          | 6 (2.2%)             | 382 (2.4%)     |        |
| AIS (Face)      | 0                    | 13,872 (84.2%)      | 216 (78.6%)          | 13,656 (84.3%) | <0.001 |
|                 | 1                    | 736 (4.8%)          | 5 (1.8%)             | 731 (4.5%)     |        |
|                 | 2                    | 1,829 (11.1%)       | 50 (18.2%)           | 1,779 (11.0%)  |        |
|                 | 3                    | 45 (0.3%)           | 4 (1.5%)             | 41 (0.3%)      |        |
| AIS (Thorax)    | 0                    | 14,160 (85.9%)      | 154 (56.0%)          | 14,006 (86.4%) | <0.001 |
|                 | 1                    | 337 (2.0%)          | 5 (1.8%)             | 332 (2.1%)     |        |
|                 | 2                    | 592 (4.0%)          | 14 (5.1%)            | 578 (3.6%)     |        |
|                 | 3                    | 948 (5.8%)          | 51 (18.6%)           | 897 (5.5%)     |        |
|                 | 4                    | 419 (2.5%)          | 43 (15.6%)           | 376 (2.3%)     |        |
|                 | 5                    | 25 (0.2%)           | 7 (2.6%)             | 18 (0.1%)      |        |
|                 | 6                    | 1 (0.01%)           | 1 (0.4%)             | 0 (0.0%)       |        |
| AIS (Abdomen)   | 0                    | 15,223 (92.4%)      | 210 (76.4%)          | 15,013 (92.6%) | <0.001 |
|                 | 1                    | 78 (0.5%)           | 1 (0.4%)             | 77 (0.5%)      |        |
|                 | 2                    | 651 (4.0%)          | 27 (9.8%)            | 624 (3.9%)     |        |
|                 | 3                    | 366 (2.2%)          | 14 (5.1%)            | 352 (2.2%)     |        |
|                 | 4                    | 129 (0.8%)          | 19 (6.9%)            | 110 (0.7%)     |        |
|                 | 5                    | 35 (0.2%)           | 4 (1.5%)             | 31 (0.2%)      |        |
| AIS (Extremity) | 0                    | 2,901 (17.6%)       | 96 (34.9%)           | 2,805 (17.3%)  | <0.001 |
|                 | 1                    | 1,034 (6.3%)        | 2 (0.7%)             | 1,032 (6.4%)   |        |
|                 | 2                    | 7,139 (43.3%)       | 89 (32.4%)           | 7,050 (43.5%)  |        |
|                 | 3                    | 5,358 (32.5%)       | 73 (26.6%)           | 5,285 (32.6%)  |        |
|                 | 4                    | 43 (0.3%)           | 12 (4.4%)            | 31 (0.2%)      |        |
|                 | 5                    | 7 (0.04%)           | 3 (1.1%)             | 4 (0.02%)      |        |
| AIS (External)  | 0                    | 14,965 (90.8%)      | 248 (90.2%)          | 14,717 (90.8%) | <0.001 |
|                 | 1                    | 1,407 (8.5%)        | 17 (6.2%)            | 1,390 (8.9%)   |        |
|                 | 2                    | 85 (0.5%)           | 2 (0.7%)             | 83 (0.5%)      |        |
|                 | 3                    | 12 (0.1%)           | 0 (0.0%)             | 12 (0.1%)      |        |
|                 | 4                    | 3 (0.02%)           | 0 (0.0%)             | 3 (0.02%)      |        |
|                 | 5                    | 5 (0.03%)           | 4 (1.5%)             | 1 (0.01%)      |        |
|                 | 6                    | 5 (0.03%)           | 4 (1.5%)             | 1 (0.01%)      |        |

AIS = abbreviated injury scale; GCS = Glasgow coma scale; ISS = injury severity score; rSI = reverse shock index; rSIG = rSI multiplied by GCS score; RTS = revised trauma score; SBP = systolic blood pressure; SI = shock index; TRISS = the trauma and injury severity score.
